# Supplementary material for: Essential Oil Extraction, Chemical Analysis and Anti-Candida Activity of Calamintha nepeta (L.) Savi subsp. glandulosa (Req.) Ball—New Approaches
Source: PubMed Central journal article supplement (PMC6155801; doi:10.3390/molecules22020203), 2017-01-26
Supplement: molecules-22-00203-s001.pdf [file molecules-22-00203-s001.pdf]

# Supplementary Materials: Essential Oil Extraction, Chemical Analysis and Anti-*Candida* Activity of *Calamintha nepeta* (L.) Savi subsp. *glandulosa* (Req.) Ball—New Approaches

Mijat Božović, Stefania Garzoli, Manuela Sabatino, Federico Pepi, Anna Baldisserotto, Elisa Andreotti, Carlo Romagnoli, Antonello Mai, Stefano Manfredini and Rino Ragno

**Table S1.** Chemical composition (%) of TEOCG mixtures from July.

| # <sup>1</sup> | Name                   | Sample <sup>2</sup> |            |             |             |             |
|----------------|------------------------|---------------------|------------|-------------|-------------|-------------|
|                |                        | JM1                 | JM2        | JM3         | JM4         | JM5         |
| 4              | 3-octanol              | 2.1 ± 0.18          | 1.8 ± 0.16 | 2.5 ± 0.22  | 2.0 ± 0.17  | 2.0 ± 0.17  |
| 5              | terpinen-4-ol          | 6.4 ± 0.49          | 0.5 ± 0.04 | 0.5 ± 0.04  | 0.5 ± 0.04  | 0.7 ± 0.05  |
| 8              | linalool               | -                   | -          | 0.5 ± 0.04  | -           | -           |
| 16             | cis-β-terpineol        | 0.5 ± 0.05          | -          | -           | 0.6 ± 0.06  | 0.6 ± 0.06  |
| 17             | crysanthenone          | 4.6 ± 0.40          | 5.7 ± 0.49 | 5.2 ± 0.45  | 5.6 ± 0.49  | 5.7 ± 0.49  |
| 19             | limonene               | 4.8 ± 0.37          | 4.4 ± 0.33 | 4.3 ± 0.33  | 1.9 ± 0.14  | 4.9 ± 0.38  |
| 23             | isopulegone            | 0.7 ± 0.06          | 0.6 ± 0.05 | 0.8 ± 0.06  | 0.7 ± 0.06  | 0.7 ± 0.06  |
| 26             | menthone               | 2.9 ± 0.24          | 2.6 ± 0.21 | 3.4 ± 0.28  | 2.7 ± 0.22  | 2.8 ± 0.23  |
| 28             | myrcene                | -                   | -          | -           | 0.6 ± 0.04  | 0.5 ± 0.03  |
| 36             | pulegone               | 72.8 ± 3.71         | 78.6 ± 4.0 | 73.4 ± 3.74 | 77.6 ± 3.96 | 76.2 ± 3.89 |
| 37             | sabinene               | -                   | -          | -           | 0.7 ± 0.05  | -           |
|                | Unidentified compounds | 5.2 ± 0.33          | 5.8 ± 0.37 | 9.4 ± 0.60  | 7.1 ± 0.45  | 5.9 ± 0.38  |

<sup>1</sup># indicate the compound identification number; <sup>2</sup>Samples' names were obtained by merging the first letter of the month, the letter M (mixture) and the serial number of the mix. Compounds are not listed in order of elution.

**Table S2.** Chemical composition (%) of TEOCG mixtures from August.

| # <sup>1</sup> | Name                   | Sample <sup>2</sup> |             |             |             |             |
|----------------|------------------------|---------------------|-------------|-------------|-------------|-------------|
|                |                        | AM1                 | AM2         | AM3         | AM4         | AM5         |
| 4              | 3-octanol              | 2.0 ± 0.18          | 1.6 ± 0.14  | 1.6 ± 0.14  | 1.6 ± 0.14  | 1.6 ± 0.14  |
| 5              | terpinen-4-ol          | 0.4 ± 0.03          | 0.4 ± 0.03  | 0.5 ± 0.04  | 0.4 ± 0.03  | 0.4 ± 0.03  |
| 1              | α-pinene               | 0.6 ± 0.05          | 0.6 ± 0.05  | 0.9 ± 0.07  | 0.8 ± 0.06  | 0.8 ± 0.06  |
| 7              | p-cymene               | 0.5 ± 0.04          | 0.4 ± 0.03  | 0.5 ± 0.04  | 0.5 ± 0.04  | 0.5 ± 0.04  |
| 14             | caryophyllene oxide    | 0.3 ± 0.01          | 0.6 ± 0.03  | 0.4 ± 0.02  | 0.5 ± 0.03  | 0.5 ± 0.03  |
| 17             | crysanthenone          | 2.7 ± 0.18          | 3.0 ± 0.20  | 3.7 ± 0.25  | 3.9 ± 0.26  | 0.4 ± 0.03  |
| 19             | limonene               | 6.2 ± 0.46          | 5.8 ± 0.43  | 5.6 ± 0.41  | 5.3 ± 0.39  | 5.3 ± 0.39  |
| 23             | isopulegone            | 0.7 ± 0.05          | 0.6 ± 0.04  | 0.6 ± 0.04  | 0.7 ± 0.05  | 0.7 ± 0.05  |
| 25             | menthol                | 0.5 ± 0.03          | 0.4 ± 0.02  | 0.4 ± 0.02  | 0.5 ± 0.03  | 0.5 ± 0.03  |
| 26             | menthone               | 4.5 ± 0.37          | 3.7 ± 0.30  | 3.8 ± 0.31  | 3.8 ± 0.31  | 3.8 ± 0.31  |
| 31             | piperitenone oxide     | 0.3 ± 0.02          | 0.2 ± 0.01  | 0.2 ± 0.01  | 0.2 ± 0.01  | 0.3 ± 0.02  |
| 32             | p-menth-1-en-8-ol      | 0.4 ± 0.03          | 0.3 ± 0.03  | 0.4 ± 0.03  | 0.4 ± 0.03  | 0.5 ± 0.04  |
| 35             | p-menthone             | -                   | 0.1 ± 0.006 | -           | -           | -           |
| 36             | pulegone               | 75.7 ± 6.28         | 78.8 ± 6.54 | 77.0 ± 6.39 | 76.4 ± 6.34 | 79.4 ± 6.59 |
|                | Unidentified compounds | 5.2 ± 0.29          | 3.5 ± 0.19  | 4.4 ± 0.24  | 5.0 ± 0.27  | 5.3 ± 0.29  |

<sup>1</sup># indicate the compound identification number; <sup>2</sup>Samples' names were obtained by merging the first letter of the month, the letter M (mixture) and the serial number of the mix. Compounds are not listed in order of elution.

**Table S3.** Chemical composition (%) of TEOCG mixtures from September.

| # <sup>1</sup> | Name                   | Sample <sup>2</sup> |             |             |             |             |
|----------------|------------------------|---------------------|-------------|-------------|-------------|-------------|
|                |                        | SM1                 | SM2         | SM3         | SM4         | SM5         |
| 4              | 3-octanol              | 2.6 ± 0.17          | 2.4 ± 0.16  | 2.1 ± 0.14  | 2.4 ± 0.16  | 2.2 ± 0.14  |
| 5              | terpinen-4-ol          | 0.8 ± 0.06          | 0.9 ± 0.07  | 0.7 ± 0.05  | 1.2 ± 0.09  | 1.1 ± 0.08  |
| 10             | β-ocimene              | 0.7 ± 0.04          | 0.7 ± 0.04  | 0.6 ± 0.03  | 0.7 ± 0.04  | 0.6 ± 0.03  |
| 11             | β-pinene               | 0.8 ± 0.05          | 0.8 ± 0.05  | 0.7 ± 0.04  | 0.7 ± 0.04  | 0.6 ± 0.04  |
| 14             | caryophyllene oxide    | 0.6 ± 0.05          | 0.5 ± 0.04  | 0.5 ± 0.04  | 0.8 ± 0.06  | 0.9 ± 0.07  |
| 17             | crysanthenone          | 1.5 ± 0.12          | 1.7 ± 0.14  | 2.3 ± 0.19  | 3.6 ± 0.29  | 4.0 ± 0.32  |
| 19             | limonene               | 10.2 ± 0.80         | 9.4 ± 0.74  | 8.3 ± 0.66  | 8.6 ± 0.68  | 7.3 ± 0.58  |
| 23             | isopulegone            | 1.3 ± 0.11          | 1.3 ± 0.11  | 1.2 ± 0.10  | 1.5 ± 0.13  | 1.5 ± 0.13  |
| 25             | menthol                | 1.6 ± 0.11          | 1.7 ± 0.11  | 1.6 ± 0.11  | 1.9 ± 0.13  | 2.0 ± 0.13  |
| 26             | menthone               | 21.5 ± 1.91         | 19.7 ± 1.75 | 16.0 ± 1.42 | 18.4 ± 1.64 | 17.3 ± 1.54 |
| 30             | piperitenone           | 1.0 ± 0.05          | 1.1 ± 0.06  | 1.5 ± 0.08  | 2.2 ± 0.12  | 2.2 ± 0.12  |
| 31             | piperitenone oxide     | 1.4 ± 0.12          | 1.2 ± 0.10  | 1.0 ± 0.09  | 1.2 ± 0.10  | 1.2 ± 0.10  |
| 36             | pulegone               | 52.4 ± 3.82         | 55.6 ± 4.06 | 60.8 ± 4.44 | 53.6 ± 3.91 | 55.6 ± 4.06 |
|                | Unidentified compounds | 3.6 ± 0.23          | 3.0 ± 0.19  | 2.7 ± 0.17  | 3.2 ± 0.21  | 3.5 ± 0.23  |

<sup>1</sup># indicate the compound identification number; <sup>2</sup>Samples' names were obtained by merging the first letter of the month, the letter M (mixture) and the serial number of the mix. Some of the compounds found in these mixtures were not present in the original fractions: this is likely due to some contamination during the mixture preparation. Compounds are not listed in order of elution.

**Table S4.** Chemical composition (%) of TEOCG mixtures from October.

| # <sup>1</sup> | Name                   | Sample <sup>2</sup> |             |             |             |             |
|----------------|------------------------|---------------------|-------------|-------------|-------------|-------------|
|                |                        | OM1                 | OM2         | OM3         | OM4         | OM5         |
| 4              | 3-octanol              | 0.6 ± 0.03          | 1.6 ± 0.09  | 1.6 ± 0.09  | 1.7 ± 0.09  | 1.5 ± 0.08  |
| 5              | terpinen-4-ol          | 0.2 ± 0.01          | 0.7 ± 0.05  | 0.7 ± 0.05  | 0.6 ± 0.04  | 0.7 ± 0.05  |
| 6              | iso-caryophyllene      | -                   | 0.5 ± 0.04  | 0.6 ± 0.05  | 0.6 ± 0.05  | 0.7 ± 0.06  |
| 17             | crysanthenone          | 0.1 ± 0.007         | 1.6 ± 0.11  | 1.8 ± 0.13  | 1.8 ± 0.13  | 2.0 ± 0.14  |
| 19             | limonene               | 2.1 ± 0.11          | 6.2 ± 0.32  | 6.0 ± 0.31  | 5.6 ± 0.29  | 6.2 ± 0.32  |
| 23             | isopulegone            | 0.3 ± 0.02          | 0.9 ± 0.06  | 0.9 ± 0.06  | 1.0 ± 0.07  | 0.9 ± 0.06  |
| 25             | menthol                | 1.2 ± 0.11          | 3.7 ± 0.35  | 3.8 ± 0.36  | 4.0 ± 0.38  | 3.8 ± 0.36  |
| 26             | menthone               | 84.6 ± 7.36         | 32.2 ± 2.80 | 30.6 ± 2.67 | 32.9 ± 2.86 | 30.0 ± 2.61 |
| 30             | piperitenone           | 0.5 ± 0.05          | -           | 1.7 ± 0.16  | -           | -           |
| 31             | piperitenone oxide     | -                   | 1.5 ± 0.08  | -           | 1.7 ± 0.09  | 1.7 ± 0.09  |
| 36             | pulegone               | 10.1 ± 0.57         | 50.5 ± 2.88 | 52.0 ± 2.96 | 49.8 ± 2.84 | 52.1 ± 2.97 |
|                | Unidentified compounds | 0.3 ± 0.02          | 0.6 ± 0.04  | 0.3 ± 0.02  | 0.3 ± 0.02  | 0.4 ± 0.03  |

<sup>1</sup># indicate the compound identification number; <sup>2</sup>Samples' names were obtained by merging the first letter of the month, the letter M (mixture) and the serial number of the mix. Compounds are not listed in order of elution.
